# Supplementary material
Source: PubMed Central journal article supplement (PMC4443341)
Supplement: pnas.201421834SI.pdf [file pnas.201421834SI.pdf]

# Supporting Information

Zelezniak et al. 10.1073/pnas.1421834112

## SI Methods

### SCS Algorithm.

```
sc_scores = {}
for A in C:
    solutions = []
    do:
        species_set = minimize_donors_set(A, C, previously found solutions)
        solutions += species_set
    while species_set !=  $\phi$ 
    for B in C:
        if A != B:
            sc_scores[(A, B)] = len([solutions containing B])/len(solutions)
```

The `minimize_donors_set` routine solves MILP problem where the objective is to minimize the number of donating species in community  $C$  while ensuring the growth of species  $A$  and satisfying all steady-state constraints as well as the uptake/secretion flux bounds. Binary constraints  $\theta_s$  control the ON/OFF-state of member species. For  $\theta_s = 0$ , sum of all secretion fluxes for the species  $s$  are set to 0. Additional constraints ensuring biomass production for all ON-state species are also included. To enumerate all possible solutions, each time a new solution is found a new constraint blocking it from the further search space is added. Finally, we also ensure that vitamins are not used by any species as a carbon source by restricting their uptake ( $v_{vit.uptake}$ ) to minimal requirement for growth (see *Methods*):

$$\min \sum_{s \in C \setminus A} \theta_s$$

subject to:

$$S_s v_s = 0, \quad \forall s \in C$$

$$v_i^{lb} \leq v_i \leq v_i^{up}, \quad \forall i \in s$$

$$v_{A.growth} = 1$$

$$\sum_{S \in L} v_{s.secretion} - \gamma \cdot \theta_s \leq 0, \quad \forall S \in C, \theta_s \in \{0,1\}, \gamma > \operatorname{argmax}(v)$$

$$v_{A.growth} - v_{A.min.growth} * \theta_s \geq 0, \quad \forall s \in C \setminus A$$

$$\sum_{s \in L} \theta_s < |L|, \quad \forall L \in \{\text{previously found solutions}\}$$

$$-\varepsilon \leq v_{vit.uptake} - v_{measured vit.uptake} * v_{vit.uptake} \leq \varepsilon$$

### MUS Algorithm.

```
mu_scores = {}
for A in C:
    solutions = []
    do:
        metabolites_set = minimize_received_metabolites_set(A, C, previously found solutions)
        solutions += metabolites_set
    while metabolites_set !=  $\phi$ 
    for m in A.received_metabolites:
        mu_scores[(A, m)] = len([solutions containing m])/len(solutions)
```

The `minimize_received_metabolites_set` routine solves MILP problem analogous to the `minimize_donors_set` routine. Its objective is to find a minimal set of metabolites donated to species *A* by other community members. Here also steady-state constraints and uptake/secretion flux bounds have to be satisfied. Here too we introduce binary variable  $\theta_m$ .  $\theta_m = 1$  represents activation of uptake of metabolite *m*. All found solutions are excluded from the solution space by adding appropriate constraints. We also ensure that vitamins are not used by any species as a carbon source by restricting their uptake ( $v_{vit,uptake}$ ) to minimal requirement for growth (see *Methods*):

$$\min \sum_{m \in \{\text{metabolites from } A\}} \theta_m$$

subject to:

$$S_s v_s = 0, \quad \forall s \in C$$

$$v^{lb} \leq v \leq v^{up}$$

$$V_{A,growth} = 1$$

$$v_m - \gamma * \theta_m \leq 0, \quad \forall m \in \{\text{metabolites uptakes from } A\}$$

$$\sum_{m \in L} \theta_m < |L|, \quad \forall L \in \{\text{previously found solutions}\}$$

$$-\varepsilon \leq v_{vit,uptake} - v_{measured\ vit,uptake} * v_{vit,uptake} \leq \varepsilon$$

**MPS Algorithm.** MPS is a binary value showing whether species *B* can produce metabolite *m* under a given nutritional environment.

mp\_scores = {}

for B in C:

  for m in {metabolites produced by B}

    mp\_scores[(B, m)] = maximize\_metabolite\_yield(m, C) >= 1

max  $v_m$ ,  $m \in \{\text{secreted metabolites from } B\}$

subject to:

$$S_s v_s = 0, \quad \forall s \in C$$

$$v^{lb} \leq v \leq v^{up}$$

$$-\varepsilon \leq v_{vit,uptake} - v_{measured\ vit,uptake} * v_{vit,uptake} \leq \varepsilon$$

**Difference Between MIP and SMETANA Score.** Whereas the MIP estimates the maximum number of nutritional components that a community can provide for itself (through interspecies metabolite exchanges), the SMETANA score quantifies the extent of interspecies exchanges. To account for the complexity of possible interspecies exchanges, due to metabolic plasticity, the SMETANA score is decomposed into three distinct factors: (i) SCS, which accounts for the plasticity at the level of community; (ii) MUS, which accounts for the plasticity at the level of nutritional requirements of member species; and (iii) MPS, which accounts for the by-product secretion capabilities of member species.

**Curated Models Used for Estimation of Reaction Directions.** Manually reconstructed models for 16 different species were obtained from the ModelSEED resource (1): *Acinetobacter baylyi* ADP1 (2), *Escherichia coli* K-12 MG1655 (3), *Methanosarcina barkeri* Fusaro (4), *Bacillus subtilis* (1), *Lactococcus lactis* ssp. *lactis* IL1403 (5), *Bacillus subtilis* 168 (6), *Mycoplasma pneumoniae* M129 (7), *Saccharomyces cerevisiae* S288c (8), *Helicobacter pylori* 26695 (9), *Pseudomonas putida* KT2440 (10), *Escherichia coli* K-12 MG1655 (11), *Saccharomyces cerevisiae* S288c (12), *Pseudomonas aeruginosa* PA01 (13), *Saccharomyces cerevisiae* S288c (14), *Mycoplasma genitalium* G-37 (15), and *Staphylococcus aureus* N315 (16).

- Henry CS, et al. (2010) High-throughput generation, optimization and analysis of genome-scale metabolic models. *Nat Biotechnol* 28(9):977–982.
- Durot M, et al. (2008) Iterative reconstruction of a global metabolic model of *Acinetobacter baylyi* ADP1 using high-throughput growth phenotype and gene essentiality data. *BMC Syst Biol* 2:85.
- Feist AM, et al. (2007) A genome-scale metabolic reconstruction for *Escherichia coli* K-12 MG1655 that accounts for 1260 ORFs and thermodynamic information. *Mol Syst Biol* 3:121.
- Feist AM, Scholten JCM, Palsson BO, Brockman FJ, Ideker T (2006) Modeling methanogenesis with a genome-scale metabolic reconstruction of *Methanosarcina barkeri*. *Mol Syst Biol* 2:0004.
- Oliveira AP, Nielsen J, Förster J (2005) Modeling *Lactococcus lactis* using a genome-scale flux model. *BMC Microbiol* 5:39.
- Henry CS, Zinner JF, Cohoon MP, Stevens RL (2009) iBsu1103: A new genome-scale metabolic model of *Bacillus subtilis* based on SEED annotations. *Genome Biol* 10(6):R69.

7. Yus E, et al. (2009) Impact of genome reduction on bacterial metabolism and its regulation. *Science* 326(5957):1263–1268.
8. Nookaew I, et al. (2008) The genome-scale metabolic model iIN800 of *Saccharomyces cerevisiae* and its validation: A scaffold to query lipid metabolism. *BMC Syst Biol* 2:71.
9. Thiele I, Vo TD, Price ND, Palsson BO (2005) Expanded metabolic reconstruction of *Helicobacter pylori* (iIT341 GSM/GPR): An in silico genome-scale characterization of single- and double-deletion mutants. *J Bacteriol* 187(16):5818–5830.
10. Nogales J, Palsson BO, Thiele I (2008) A genome-scale metabolic reconstruction of *Pseudomonas putida* KT2440: iJN746 as a cell factory. *BMC Syst Biol* 2:79.
11. Reed JL, Vo TD, Schilling CH, Palsson BO (2003) An expanded genome-scale model of *Escherichia coli* K-12 (iJR904 GSM/GPR). *Genome Biol* 4(9):R54.
12. Zomorodi AR, Maranas CD (2010) Improving the iMM904 *S. cerevisiae* metabolic model using essentiality and synthetic lethality data. *BMC Syst Biol* 4:178.
13. Oberhardt MA, Puchalka J, Fryer KE, Martins dos Santos VA, Papin JA (2008) Genome-scale metabolic network analysis of the opportunistic pathogen *Pseudomonas aeruginosa* PAO1. *J Bacteriol* 190(8):2790–2803.
14. Duarte NC, Herrgård MJ, Palsson BO (2004) Reconstruction and validation of *Saccharomyces cerevisiae* iND750, a fully compartmentalized genome-scale metabolic model. *Genome Res* 14(7):1298–1309.
15. Suthers PF, et al. (2009) A genome-scale metabolic reconstruction of *Mycoplasma genitalium*, iPS189. *PLOS Comput Biol* 5(2):e1000285.
16. Becker SA, Palsson BO (2005) Genome-scale reconstruction of the metabolic network in *Staphylococcus aureus* N315: An initial draft to the two-dimensional annotation. *BMC Microbiol* 5:8.

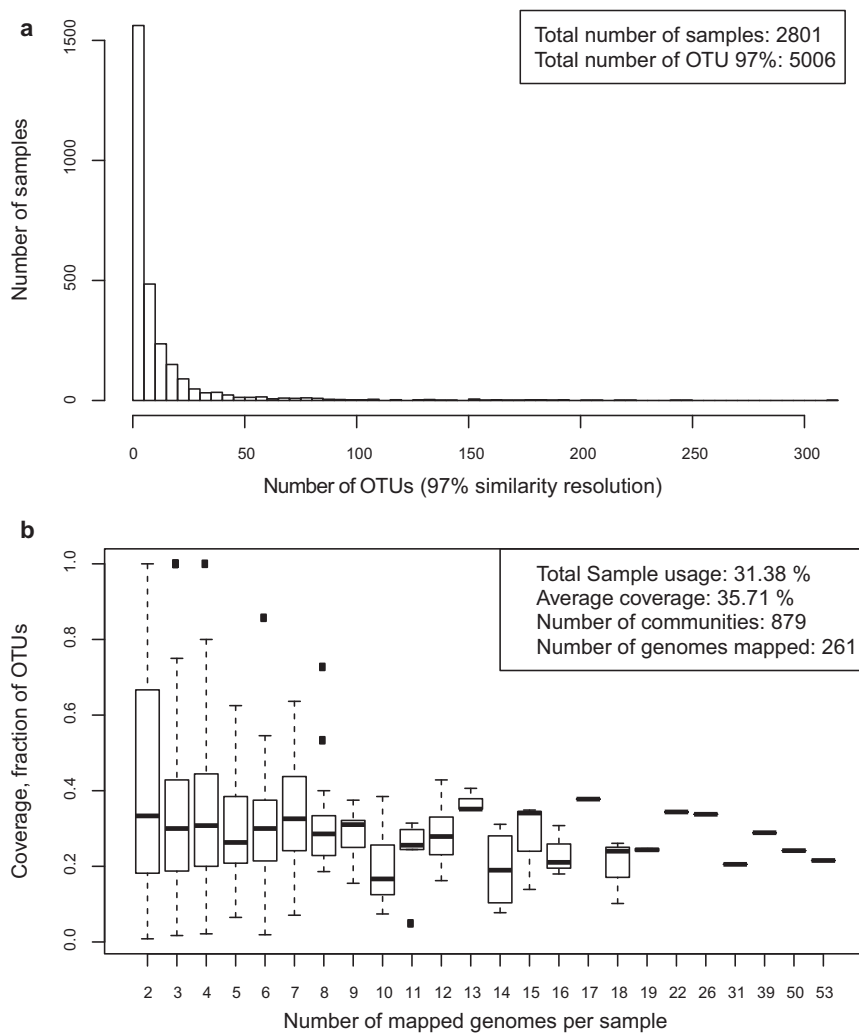

**Fig. S1.** Summary statistics of the OTU to genome mappings. (A) Distribution of OTUs across different sampling sites. (B) Sample coverage by mapped genomes.

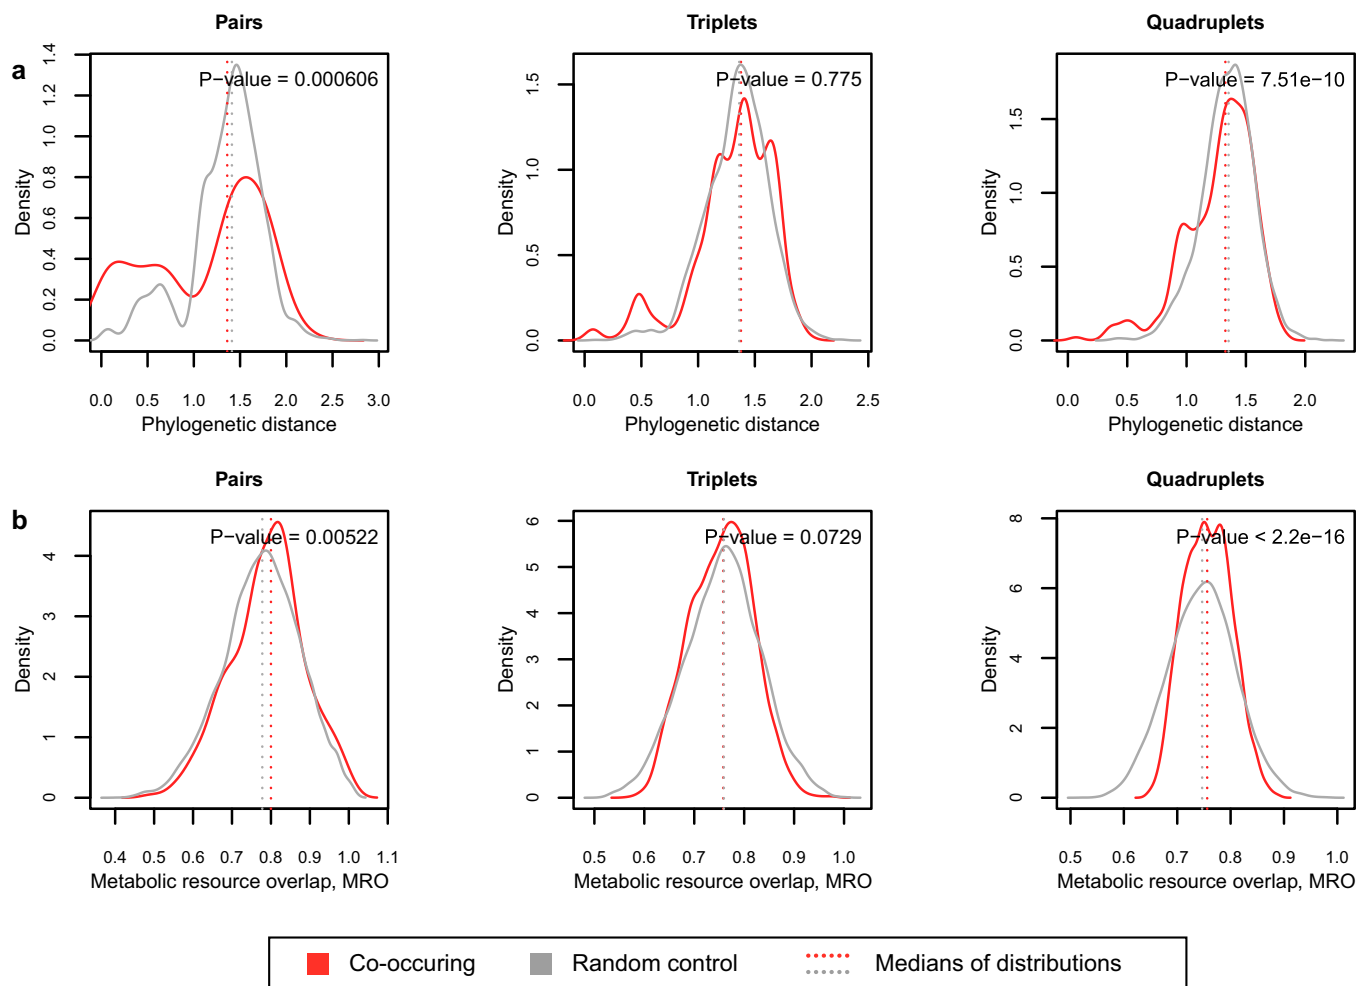

**Fig. S2.** Competition metrics of co-occurring subcommunities compared with random assemblies. Neither phylogenetic distance (A) nor MRO (B) can discern co-occurring subcommunities from random assemblies. Results for the random control are based on simulations of 10,000 groups randomly assembled from the same species pool.

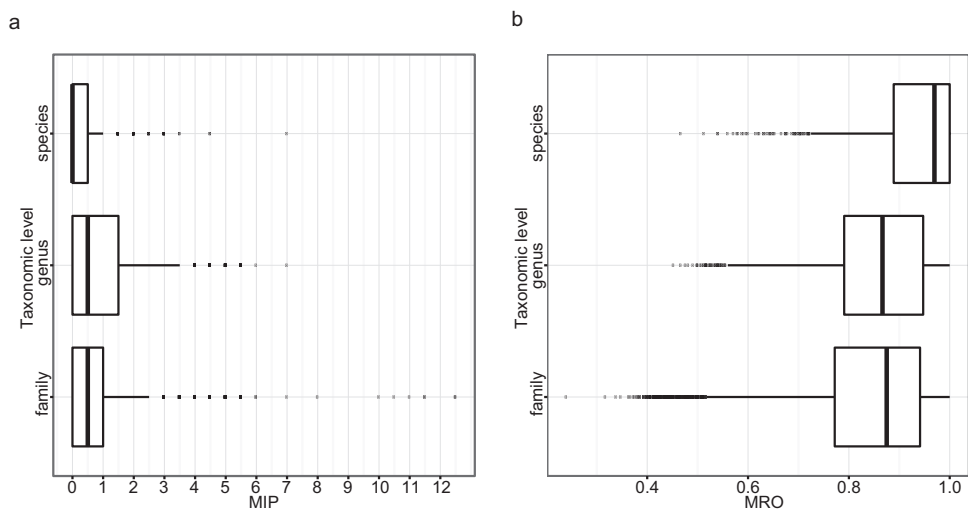

**Fig. S3.** MIP (A) and MRO (B) distribution for the species pairs belonging to the same taxonomic level.

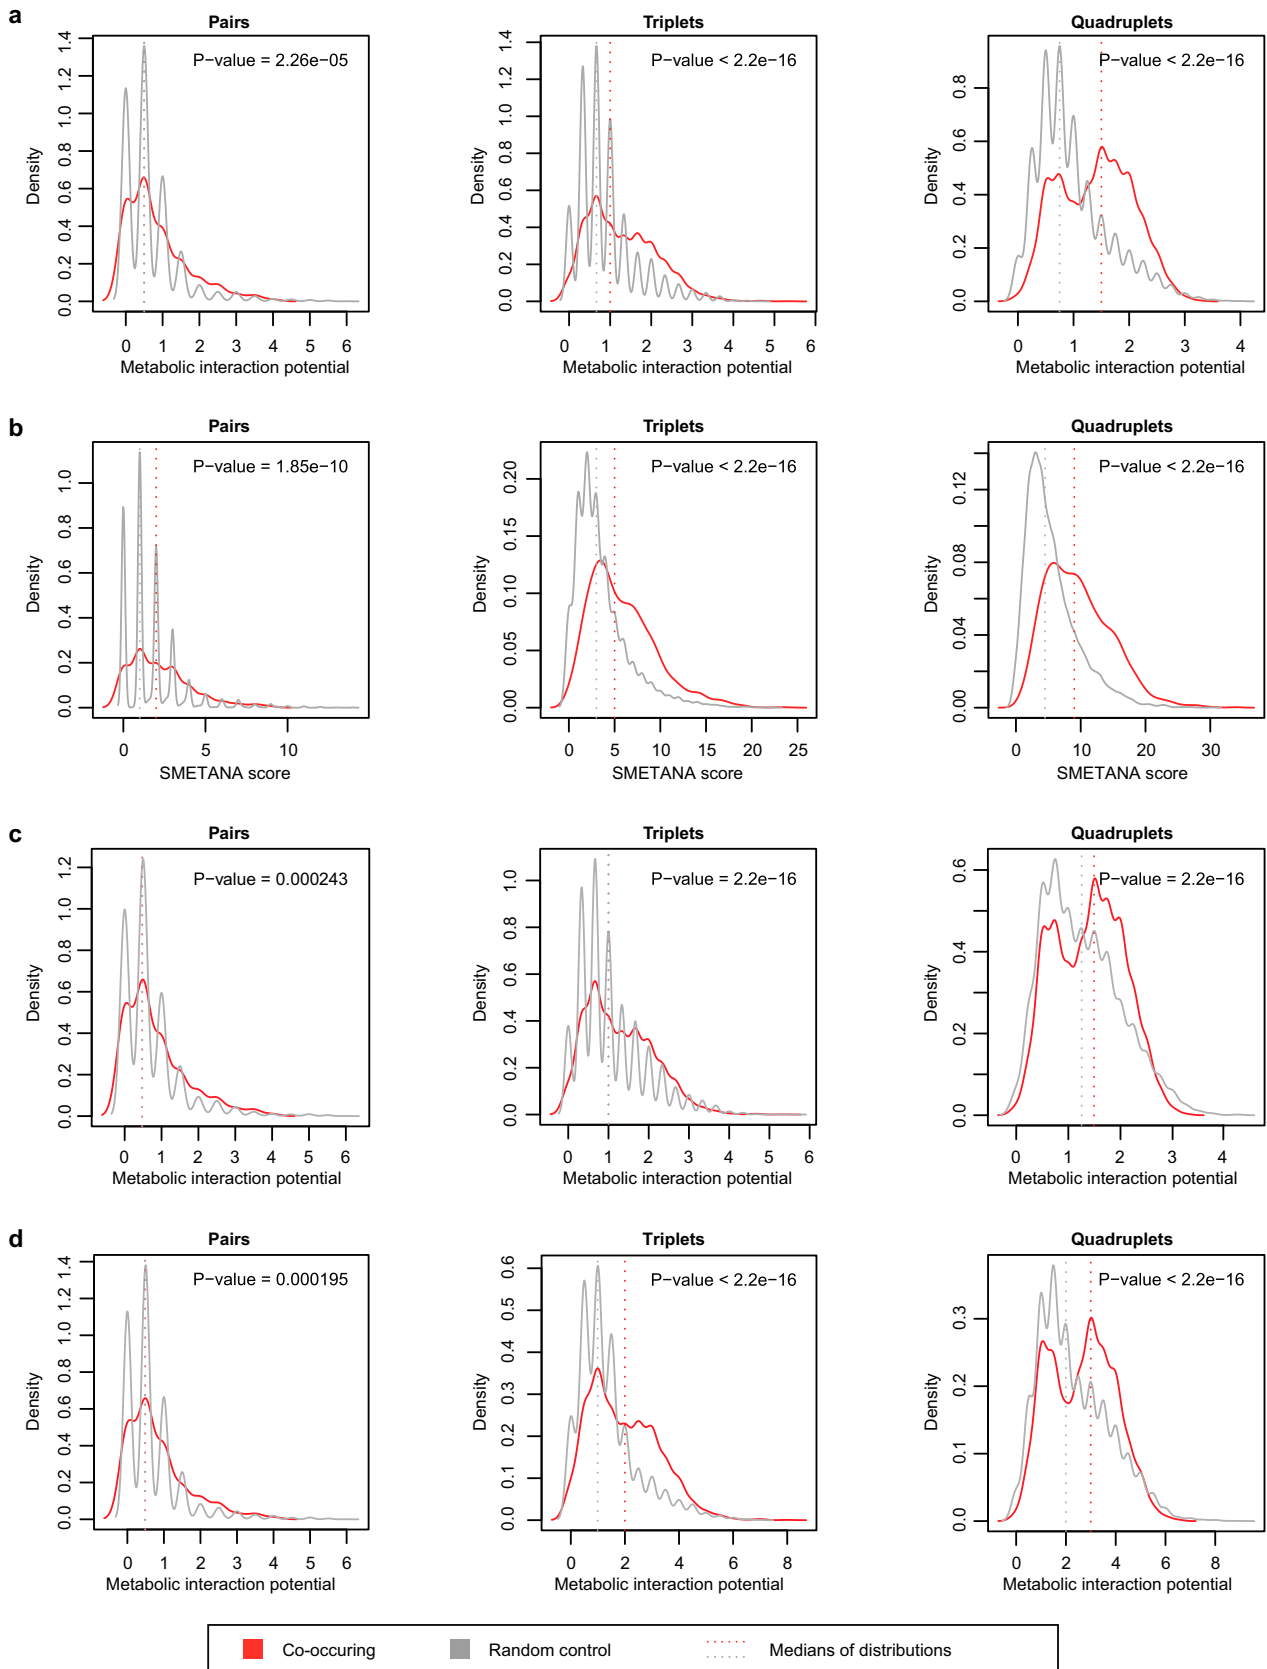

**Fig. S4.** Cooperation metrics of co-occurring communities compared with random assemblies. Co-occurring communities feature higher interaction potential (A) and higher metabolic coupling (B) than non-co-occurring groups. Results for the random control are based on simulations of 10,000 groups randomly assembled from the same species pool. Choosing these random assemblies from habitat-filtered (C) or rich habitats (D) preserves the distinction of co-occurring groups. Habitats for which the descriptions lacked the words “water” or “rock” were considered as rich. Habitats with the annotation “sewer” were, however, retained as rich.

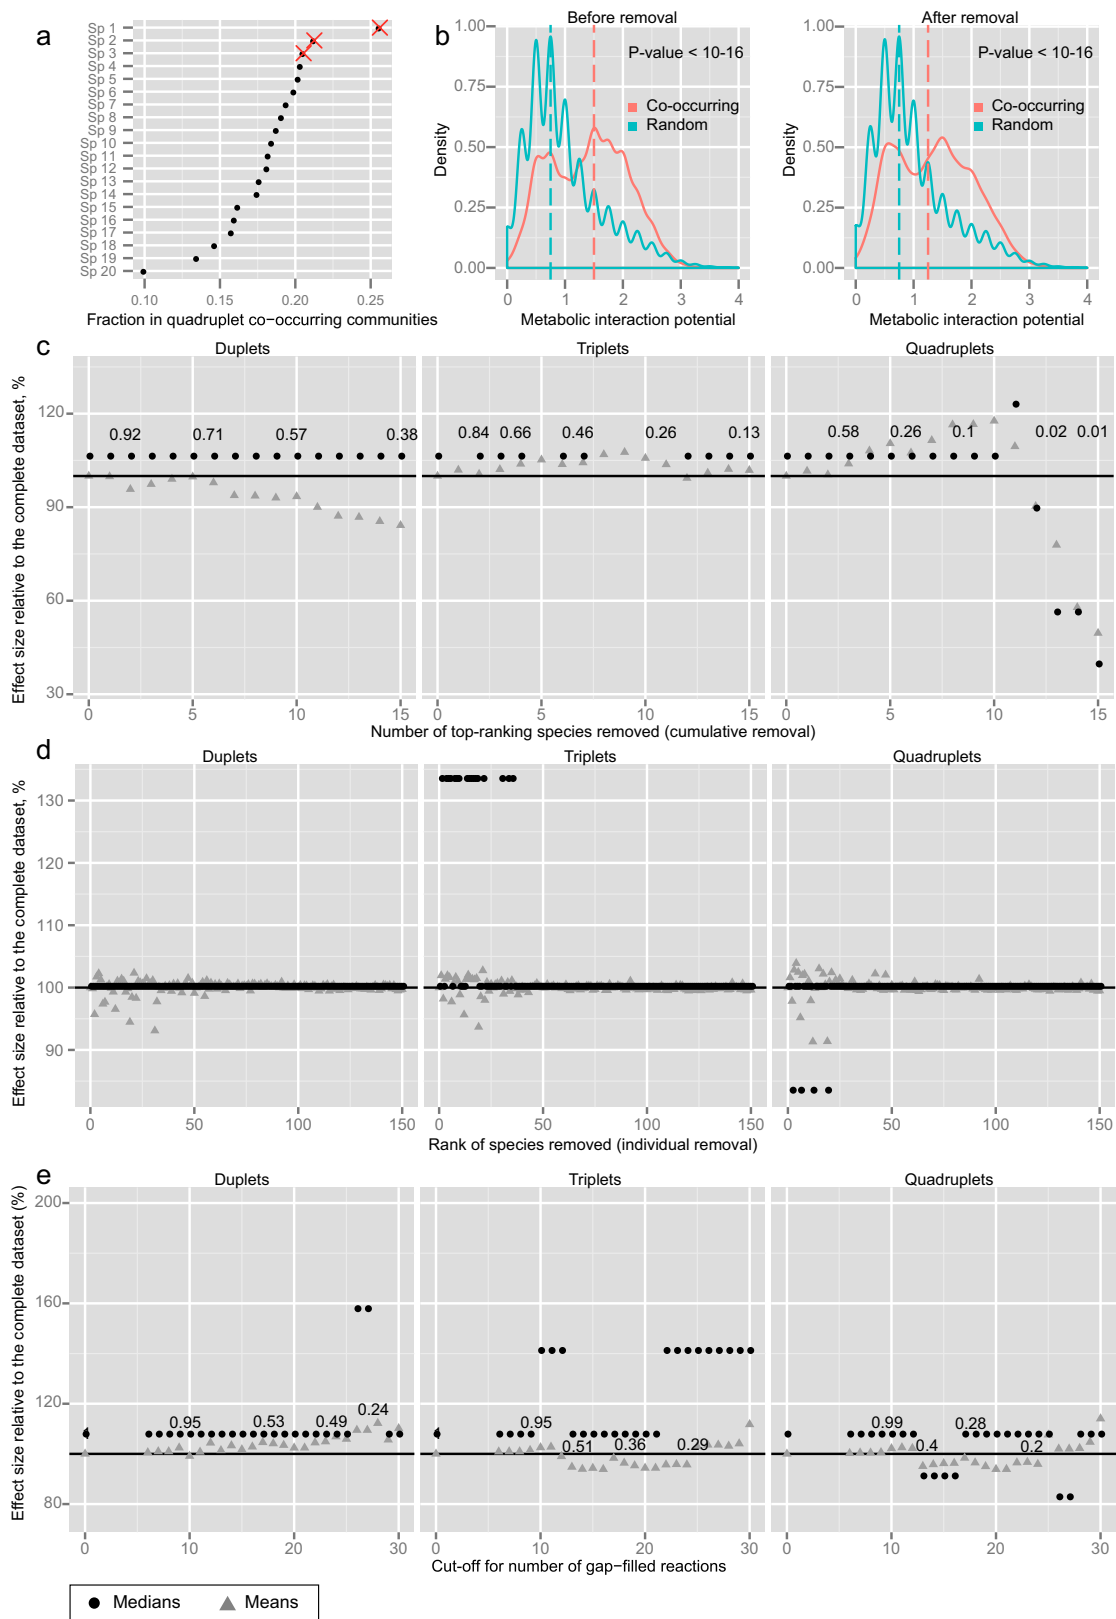

**Fig. S5.** Robustness of MIP values of co-occurring subcommunities toward species composition and gap-filled reactions in metabolic models. (*A* and *B*) Removal of the three most frequent species (found in 52% of all co-occurring subcommunities) retains the contrast between the co-occurring subcommunities (red density plots) and random assemblies (gray density plots). (*C* and *D*) Cumulative (*C*) or individual (*D*) removal of top-ranking co-occurring species (Table S3) retains the contrast between co-occurring subcommunities and random assemblies. Shown are the effect sizes following species removal [ $\log$  ratio of the medians (circles) or means (triangles)]. (*E*) The use of subsets of models with different numbers of gap-filled reactions does not affect the MIP effect size discriminating co-occurring subcommunities from random assemblies. Numbers in the plot show the fraction of remaining subcommunities, after removing those containing species with fewer than  $n$  gap-filled reactions ( $x$  axis). We here note that the distribution of the number of gap-filled reactions in species forming co-occurring subcommunities is similar to that for the non-co-occurring subcommunities ( $P = 0.66$ ).

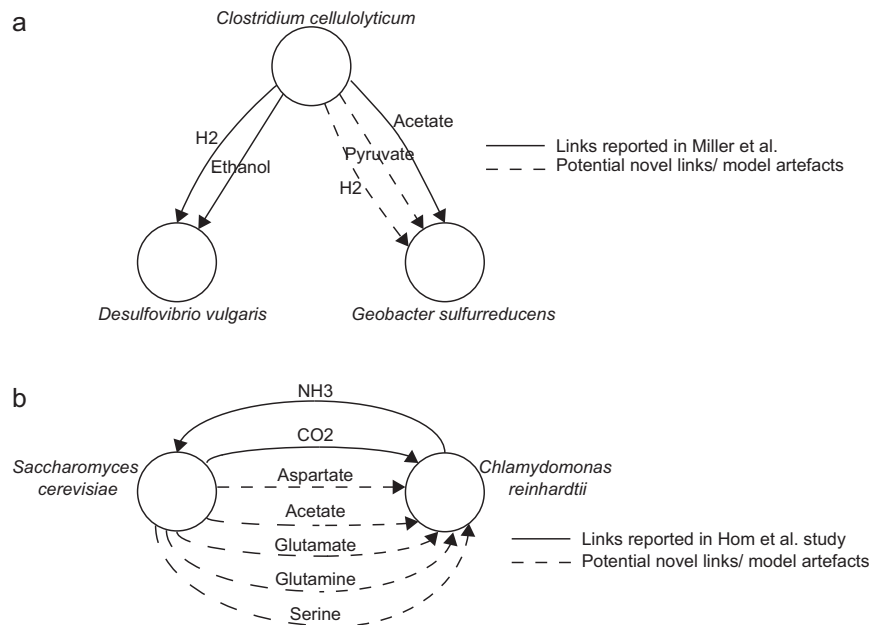

**Fig. S6.** Predicted metabolic interactions accurately capture experimental results (A) in a three-species community reported by Miller et al. (1) and (B) a yeast-algal community reported by Hom and Murray (2). Models for three species community were obtained from Zomorrodi and Maranas (3). Published species-level models of *C. reinhardtii* (4) and the *S. cerevisiae* (5) were used for reconstructing the yeast–algal community model.  $\text{NO}_3^-$  and  $\text{H}_2\text{S}$  were used in simulations instead of  $\text{NO}_2^-$  and  $\text{SO}_4^{2-}$  to maintain compatibility with the species models. Glucose uptake reaction in the *C. reinhardtii* model was blocked as suggested in the experimental study (2). Dotted arrows mark potential novel interactions, or possibly model artifacts [e.g., predicted pyruvate link in the community (A)].

1. Miller LD, et al. (2010) Establishment and metabolic analysis of a model microbial community for understanding trophic and electron accepting interactions of subsurface anaerobic environments. *BMC Microbiol* 10:149.
2. Hom EF, Murray AW (2014) Plant-fungal ecology. Niche engineering demonstrates a latent capacity for fungal-algal mutualism. *Science* 345(6192):94–98.
3. Zomorrodi AR, Maranas CD (2012) OptCom: A multi-level optimization framework for the metabolic modeling and analysis of microbial communities. *PLoS Comput Biol* 8(2):e1002363.
4. Dal’Molin CGD, Quek LE, Palfreyman RW, Nielsen LK (2011) AlgaGEM—A genome-scale metabolic reconstruction of algae based on the *Chlamydomonas reinhardtii* genome. *BMC Genomics* 12(Suppl 4):S5.
5. Zomorrodi AR, Maranas CD (2010) Improving the iMM904 *S. cerevisiae* metabolic model using essentiality and synthetic lethality data. *BMC Syst Biol* 4:178.

**Table S1. Summary statistics of the number of co-occurring subcommunities and OTU to genome mappings**

| OTUs/sites                                                                                     | Pairs | Triplets | Quadruplets | Total   |
|------------------------------------------------------------------------------------------------|-------|----------|-------------|---------|
| Co-occurring subcommunities identified, FDR <0.01                                              | 381   | 3,322    | 3,518       | 7,221   |
| No. of possible subcommunities observed in samples                                             | 2,379 | 21,570   | 77,664      | 10,1613 |
| No. of OTUs with 97% sequence identity                                                         | 5,006 |          |             |         |
| No. of OTUs mapped with 95% sequence identity and appearing at least three times among samples | 536   |          |             |         |
| No. of sampling sites in which mapped genomes were present                                     | 1,297 |          |             |         |

**Table S2. List of compounds assumed to be present in all environments**

| Compound ID | Compound name synonyms                                                                |
|-------------|---------------------------------------------------------------------------------------|
| cpd04098    | Arsenite                                                                              |
| cpd00971    | Na+, sodium                                                                           |
| cpd00254    | Mg(2+), Mg, Mg2+, magnesium                                                           |
| cpd00009    | Orthophosphoric acid, phosphoric acid, phosphate, orthophosphate                      |
| cpd00209    | Nitric acid, nitrate                                                                  |
| cpd00074    | Sulfur, precipitated, S, sulfur                                                       |
| cpd01012    | Cd2+, cadmium                                                                         |
| cpd00528    | N2, nitrogen                                                                          |
| cpd00058    | Copper, Cu+, Cu(I), Cu1+, copper1, Cu(II), Cu2+, copper2                              |
| cpd00099    | Hydrochloride, hydrogen chloride, hydrochloric acid, chloride ion, Cl-, HCl, chloride |
| cpd00063    | Ca(2+), Ca <sup>2+</sup> , calcium                                                    |
| cpd10515    | Iron(2+), ferrous ion, Fe(II), Fe2+                                                   |
| cpd00048    | SLF, sulfuric acid, sulfate                                                           |
| cpd00012    | PPi, diphosphate, pyrophosphoric acid, pyrophosphate                                  |
| cpd00034    | Zn(II), Zn2+, zinc                                                                    |
| cpd00007    | dioxygen, O2, oxygen                                                                  |
| cpd10516    | fe3, Iron(3+), ferric ion, Fe(III), Fe3+                                              |
| cpd00011    | Carbon dioxide, CO <sub>2</sub>                                                       |
| cpd00075    | Nitrite                                                                               |
| cpd00244    | Ni2+, nickel                                                                          |
| cpd00067    | H+                                                                                    |
| cpd00149    | Co2+, cobalt                                                                          |
| cpd04097    | Pb2+, Pb, lead                                                                        |
| cpd00030    | Mn(III), Mn(II), Mn2+, manganese                                                      |
| cpd00205    | K+, potassium                                                                         |
| cpd00001    | OH-, HO-, water, H <sub>2</sub> O                                                     |

**Table S3. List of the top 20 frequent species mapping to co-occurring subcommunities**

| Name                                                                       | Model_seed ID       | Fraction    |
|----------------------------------------------------------------------------|---------------------|-------------|
| <i>Corynebacterium diphtheriae</i> NCTC 13129                              | Seed257309.4.51162  | 0.206938776 |
| <i>Rothia mucilaginosa</i> DY-18                                           | Seed680646.3.51162  | 0.15755102  |
| <i>Streptococcus sanguinis</i> SK36                                        | Seed388919.8.51162  | 0.156054422 |
| <i>Streptococcus mitis</i> B6                                              | Seed365659.3.51162  | 0.14952381  |
| <i>Staphylococcus lugdunensis</i> HKU09-01                                 | Seed698737.3.51162  | 0.147210884 |
| <i>Streptococcus pyogenes</i> NZ131                                        | Seed471876.6.51162  | 0.144489796 |
| <i>Staphylococcus aureus</i> subsp. <i>aureus</i> USA300_TCH1516           | Seed451516.9.51162  | 0.143129252 |
| <i>Methylobacterium radiotolerans</i> JCM 2831                             | Seed426355.14.51162 | 0.142585034 |
| <i>Streptococcus gordonii</i> str. Challis substr. CH1                     | Seed467705.9.51162  | 0.140952381 |
| <i>Acinetobacter baumannii</i> AYE                                         | Seed509173.8.51162  | 0.139455782 |
| <i>Corynebacterium aurimucosum</i> ATCC 700975                             | Seed548476.3.51162  | 0.139455782 |
| <i>Anaerococcus prevotii</i> DSM 20548                                     | Seed525919.6.51162  | 0.138231293 |
| <i>Neisseria meningitidis</i> alpha14                                      | Seed662598.3.51162  | 0.136734694 |
| <i>Neisseria meningitidis</i> FAM18                                        | Seed272831.7.51162  | 0.135782313 |
| <i>Streptococcus pneumoniae</i> D39                                        | Seed373153.27.51162 | 0.132244898 |
| <i>Kocuria rhizophila</i> DC2201                                           | Seed378753.5.51162  | 0.13170068  |
| <i>Veillonella parvula</i> DSM 2008                                        | Seed479436.4.51162  | 0.123809524 |
| <i>Staphylococcus saprophyticus</i> subsp. <i>saprophyticus</i> ATCC 15305 | Seed342451.4.51162  | 0.116326531 |
| <i>Lactobacillus crispatus</i> ST1                                         | Seed748671.3.51162  | 0.113877551 |
| <i>Propionibacterium acnes</i> SK137                                       | Seed553199.9.51162  | 0.094829932 |

Note that the species mapping is subject to the pool of genome-sequenced species/strains against which mapping is performed.
